# Supplementary material
Source: PubMed Central journal article supplement (PMC4096908)
Supplement: NIHMS611797-supplement-SI.pdf [file NIHMS611797-supplement-SI.pdf]

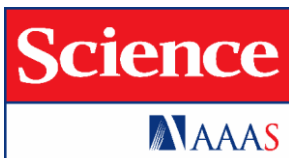

## Supplementary Materials for

### **Neuronal Activity Promotes Oligodendrogenesis and Adaptive Myelination in the Mammalian Brain**

Erin M. Gibson, David Purger, Christopher W. Mount, Andrea K. Goldstein, Grant L. Lin, Lauren S. Wood, Ingrid Inema, Sarah E. Miller, Gregor Bieri, J. Bradley Zuchero, Ben A. Barres, Pamelyn J. Woo, Hannes Vogel, Michelle Monje\*

\*Corresponding author. E-mail: [mmonje@stanford.edu](mailto:mmonje@stanford.edu)

Published 10 April 2014 on *Science* Express  
DOI: 10.1126/science.1252304

**This PDF file includes:**

Caption for Movie S1  
Figs. S1 to S10  
Full Reference List

**Other Supplementary Material for this manuscript includes the following:**  
(available at [www.sciencemag.org/cgi/content/full/science.1252304/DC1](http://www.sciencemag.org/cgi/content/full/science.1252304/DC1))

Movie S1

**Movie S1. Optogenetic stimulation of M2 motor cortex elicits unidirectional ambulation.** Video of the behavioral response in a P35 Thy1::ChR2 mouse to optogenetic stimulation of M2 motor cortex. After attachment of the implanted fiber optic ferrule in the right hemisphere to a mono fiber patch cord connected to a 100-mW 473-nm DPSS laser system, pulses of light were administered (~1 mW output at tip of fiber optic) at 20 Hz every 2 minutes for 30 seconds. The animal behaves freely during the “light off” period. When the “light on” period ensues, the animal circles to the left continuously until the next “light off” period.

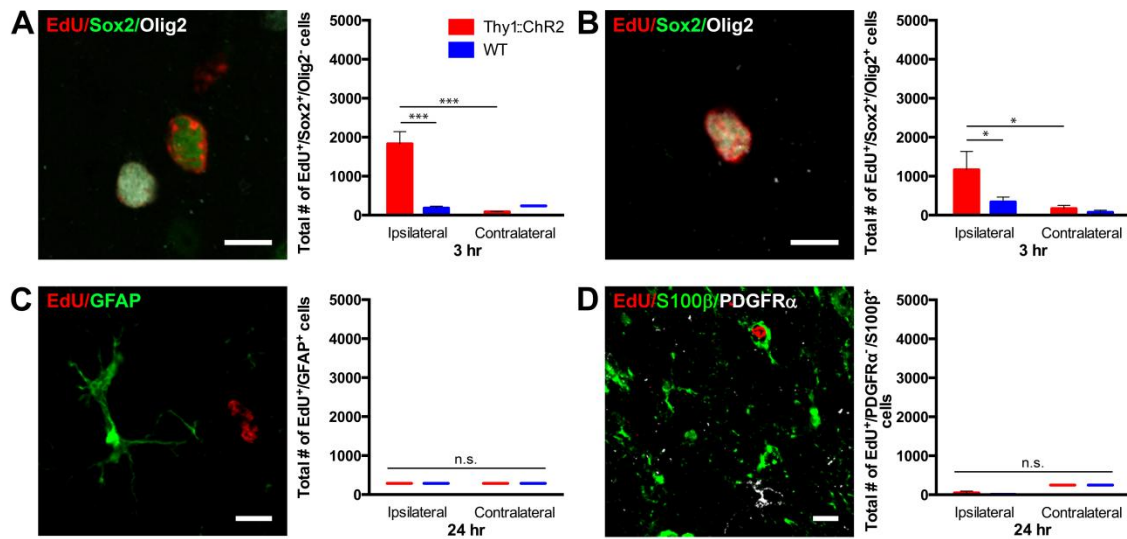

**Fig. S1. Neuronal activity promotes NPC but not astrocyte proliferation.** (A-D) Representative confocal micrographs of EdU<sup>+</sup> cells (red) and cell identity markers, together with total number of EdU-marked cells in M2 of a given cell identity within the first day following optogenetic stimulation at P35. (A) EdU<sup>+</sup>/Sox2<sup>+</sup>/Olig2<sup>-</sup> cells expressing a neural precursor cell (NPC) phenotype three hours following optogenetic manipulation. Sox2 (green) marks heterogeneous neural precursor cell populations in the postnatal mouse cortex, including a neurosphere-forming population (26), oligodendroglial lineage (Olig2<sup>+</sup>, white) precursors (B) and astrocytic cell populations expressing markers such as GFAP (C) and S100β (D) (58). EdU did not co-localize with GFAP<sup>+</sup> (green) astrocytes (C) nor S100β<sup>+</sup>/PDGFRα<sup>-</sup> astrocytes (D), measured at 24 hours. (D) Confocal micrograph illustrating a rare EdU<sup>+</sup>/S100β<sup>+</sup> astrocyte (S100β = green, PDGFRα = white). In all graphs, red bars = Thy1::ChR2 mice and blue bars = WT littermate controls identically manipulated. \**P* < 0.05, \*\**P* < 0.01, \*\*\**P* < 0.001. n.s. indicates *P* > 0.05. Error bars, SEM. Scale bars = 10 μm. C-D: Value of (—) over x-axis = 0 ± 0.

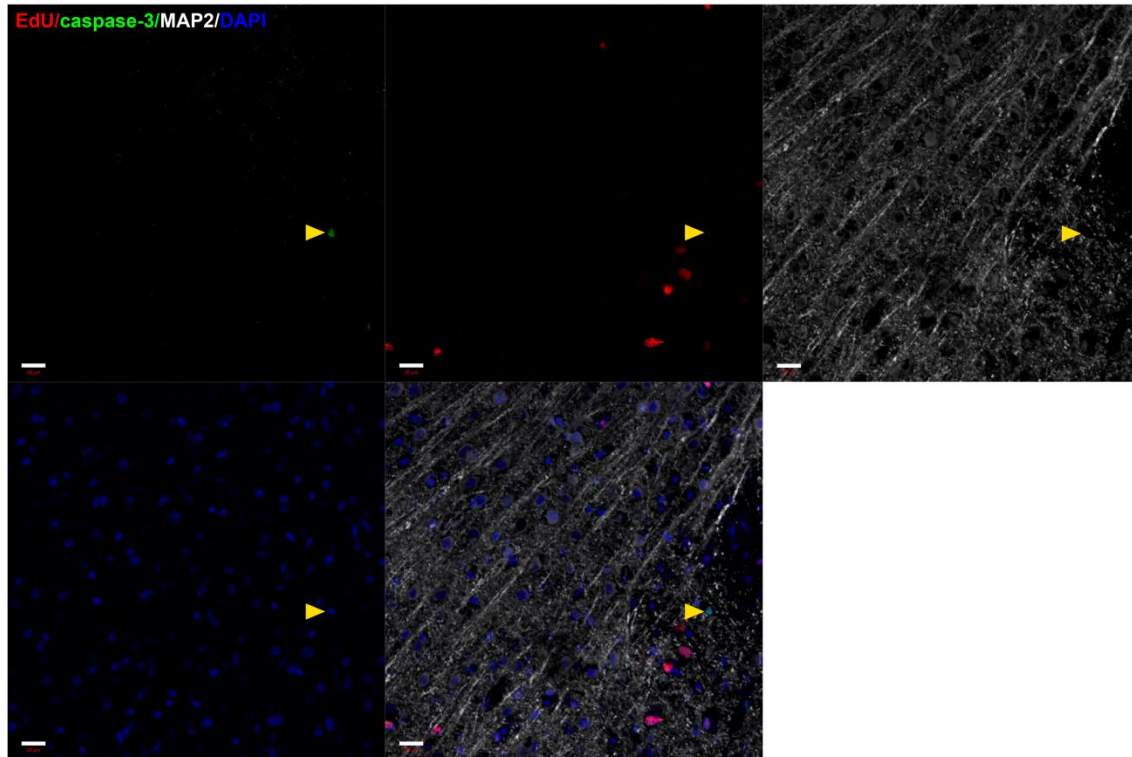

**Fig. S2. Optogenetic stimulation did not cause apoptotic neuronal cell death.** Confocal micrograph demonstrating cleaved caspase-3 immunostaining indicates rare cleaved caspase-3 apoptotic nuclei in the M2 cortex three hours following optogenetic stimulation at 20 Hz for 30 seconds every two minutes for 30 minutes. The single caspase-3<sup>+</sup> (green) cell found in this section within the premotor cortex is indicated by a yellow arrowhead; it does not co-localize with the neuronal marker MAP2 (white), nor were any apoptotic neurons observed. EdU = red; DAPI = blue. Scale bar = 20  $\mu$ m.

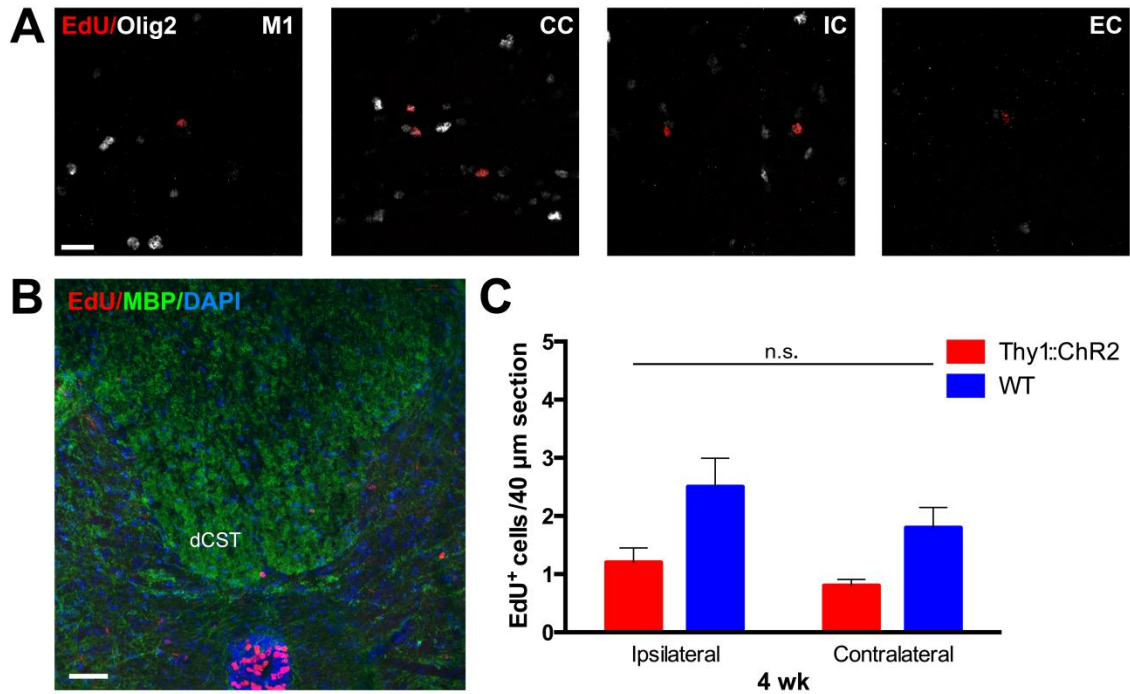

**Fig. S3. Proliferating cells disperse, but are not found at the level of the cervical spinal cord.** (A) By four weeks following optogenetic stimulation EdU-marked cells remain largely localized to area M2 and subcortical projections, but have also dispersed to some degree such that EdU<sup>+</sup>/Olig2<sup>+</sup> cells are found in the neighboring primary motor cortex (M1), corpus callosum (CC) and internal capsule (IC); an EdU<sup>+</sup>/Olig2<sup>+</sup> cell is shown in the external capsule (EC). (B) Confocal photomicrograph of a transverse section through the cervical spinal cord of a Thy1::ChR2 mouse 4 weeks post-stimulation. There is not an increase in the number of EdU<sup>+</sup> (red) cells detected in the spinal cord dorsal corticospinal tract (dCST). MBP = green; DAPI = blue. Scale bar = 50 μm. (C) Density of EdU<sup>+</sup> cells (average number of cells per 40-μm section) in the dorsal corticospinal tracts of the cervical spinal cord four weeks following optogenetic stimulation in Thy1::ChR2 ( $n = 4$ ) or WT ( $n = 3$ ) mice. Note that the corticospinal tract decussates at the level of the medullary pyramids, and thus the stimulated corticospinal tract is contralateral to the optogenetically-stimulated premotor cortex. Error bars, SEM; n.s. indicates  $P > 0.05$ .

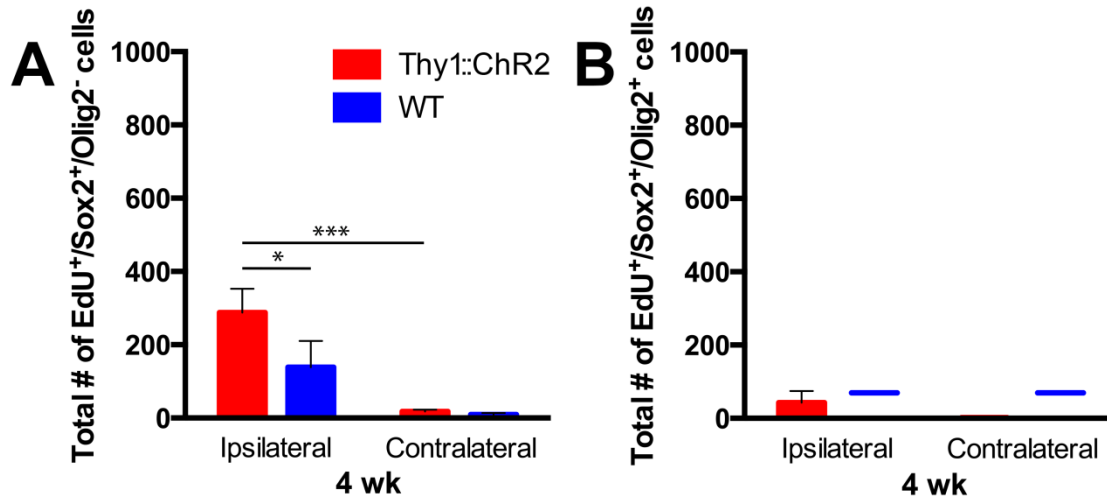

**Fig. S4. EdU-marked Sox2<sup>+</sup> cells in M2 cortex at 4 weeks**

(**A-B**) Sox2<sup>+</sup> cells evident four weeks following the completion of the 7-day optogenetic stimulation paradigm (P35-P42) in Thy1::ChR2 ( $n = 4$ ) or WT ( $n = 3$ ) mice. (**A**) EdU<sup>+</sup> neural precursor cells (EdU<sup>+</sup>/Sox2<sup>+</sup>/Olig2<sup>-</sup>) and (**B**) oligodendroglial precursor cells (EdU<sup>+</sup>/Sox2<sup>+</sup>/Olig2<sup>+</sup>) quantified in the M2 cortex. In all graphs, red bars = Thy1::ChR2 mice and blue bars = WT littermate controls identically manipulated. \* $P < 0.05$ , \*\*\* $P < 0.001$ . Error bars, SEM. Value of (—) over x-axis =  $0 \pm 0$ .

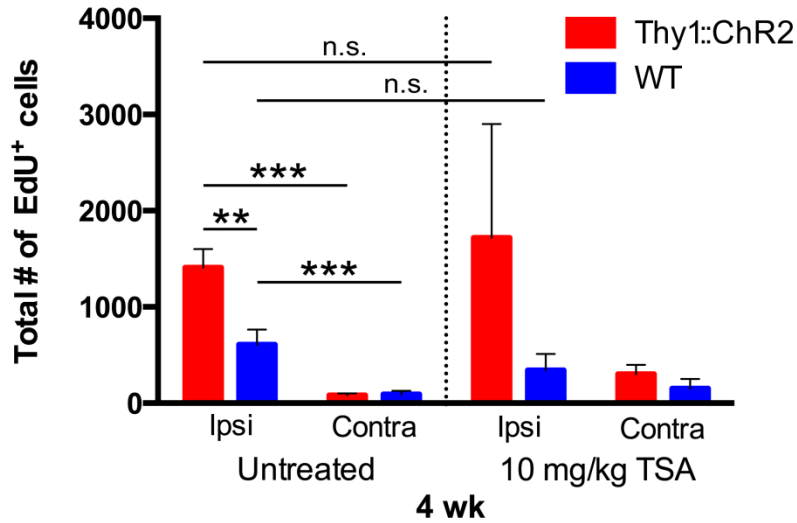

**Fig. S5. Treatment with trichostatin A (TSA) does not affect total numbers of EdU<sup>+</sup> cells.** Administration of the HDAC inhibitor trichostatin A (TSA) during the 7-day stimulation paradigm does not affect the total number of EdU<sup>+</sup> cells detected four weeks following the end of the stimulation paradigm. Data from non-drug-treated animals (presented in Fig. 4A) are repeated here for reference in the left-hand side of the graph. In all graphs, red bars = Thy1::ChR2 mice and blue bars = WT littermate controls identically manipulated.  $n = 4$  Thy1::ChR2 mice, 3 WT mice; \*\* $P < 0.01$ , \*\*\* $P < 0.001$ , n.s. indicates  $P > 0.05$ , Error bars, SEM.

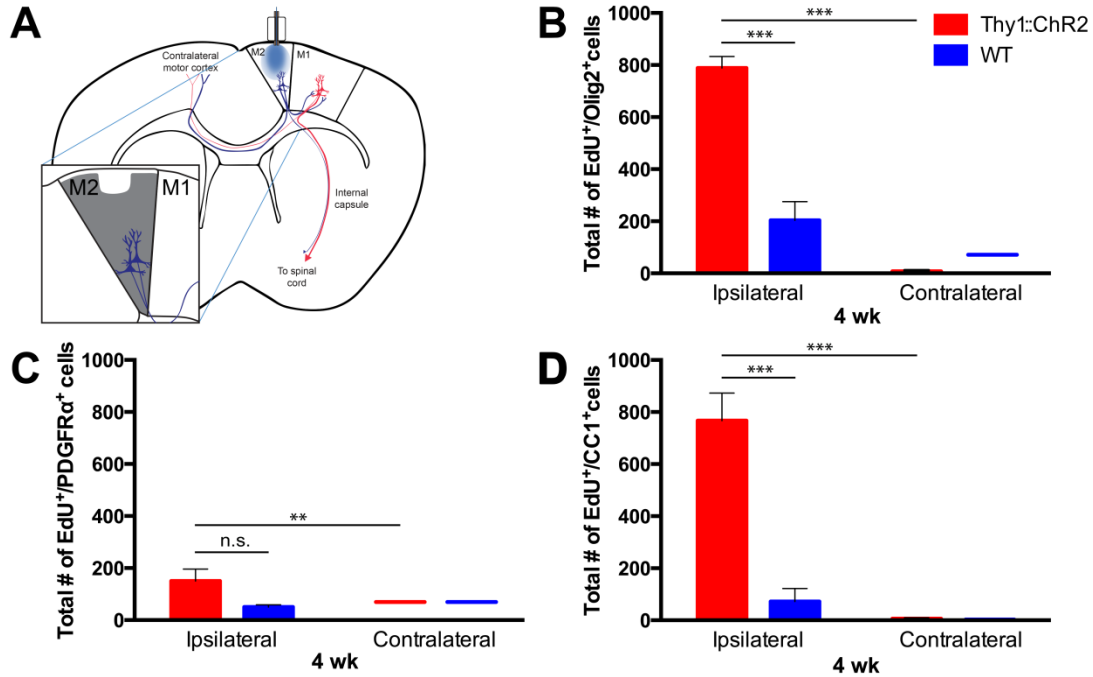

**Fig. S6. Neuronal activity promotes oligodendrogenesis in the adult M2 cortex**

Thy1::ChR2 and WT optogenetically-stimulated mice sacrificed 4 weeks following a 7-day stimulation paradigm (P84-P90). **(A)** Schematic illustrating the premotor cortex region quantified (shaded grey). **(B-D)** Quantification of cell identity markers of EdU-marked surviving cells quantified in adult M2 cortex reveals **(B)** persistent EdU<sup>+</sup> oligodendroglial lineage cells (Olig2<sup>+</sup>), **(C)** with diminution of the oligodendrocyte precursor cell (PDGFRα<sup>+</sup>) population and **(D)** concomitant appearance of EdU-marked mature CC1<sup>+</sup> oligodendrocytes. In all graphs, red bars = Thy1::ChR2 mice and blue bars = WT littermate controls identically manipulated. *n* = 4 Thy1::ChR2 mice, 3 WT mice; \**P* < 0.05, \*\**P* < 0.01, \*\*\**P* < 0.001. n.s. indicates *P* > 0.05. Error bars, SEM. Value of (—) over x-axis = 0 ± 0.



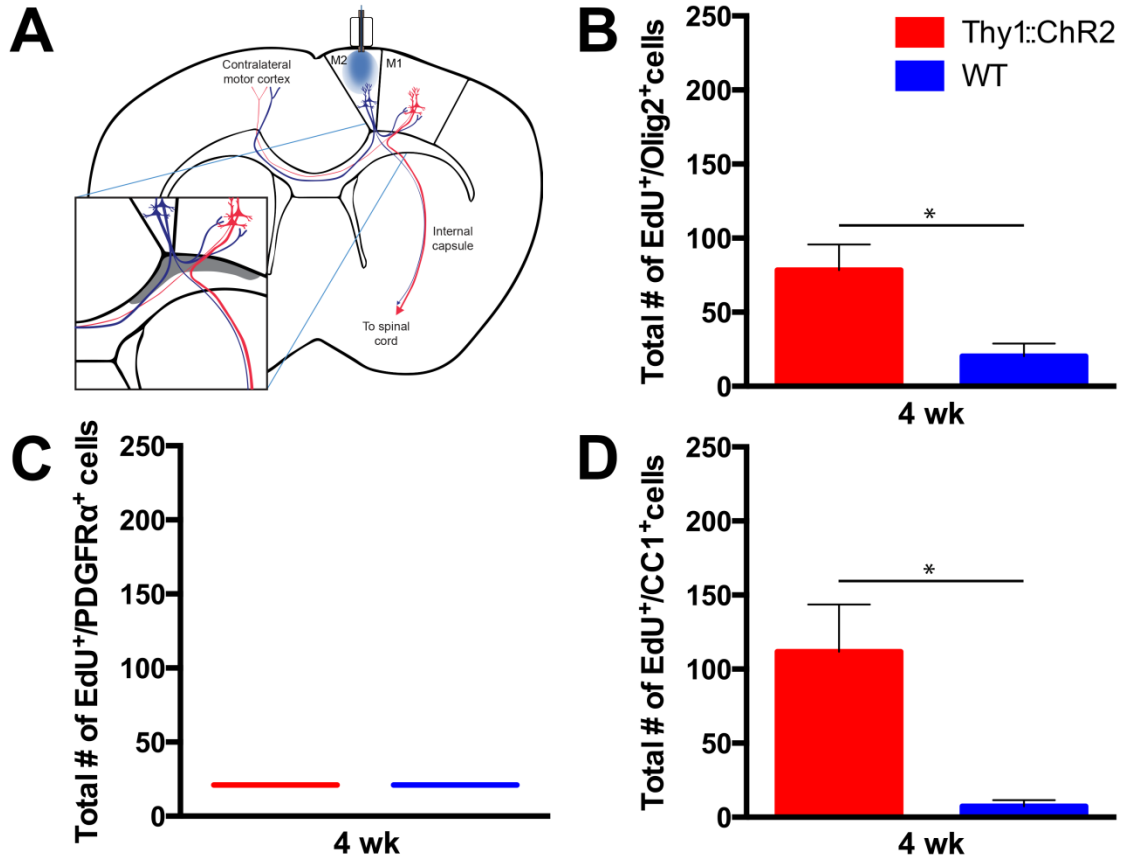

**Fig. S7. Neuronal activity promotes oligodendrogenesis in the adult corpus callosum**  
Thy1::ChR2 and WT optogenetically-stimulated mice sacrificed 4 weeks following a 7-day stimulation paradigm (P84-P90). **(A)** Schematic illustrating the corpus callosum region quantified (shaded grey). **(B-D)** Quantification of cell identity markers of EdU-marked surviving cells quantified in adult corpus callosum reveals **(B)** persistent EdU<sup>+</sup> oligodendroglial lineage cells (Olig2<sup>+</sup>), **(C)** with diminution of the oligodendrocyte precursor cell (PDGFR $\alpha$ <sup>+</sup>) population and **(D)** concomitant appearance of EdU-marked mature CC1<sup>+</sup> oligodendrocytes. In all graphs, red bars = Thy1::ChR2 mice and blue bars = WT littermate controls identically manipulated.  $n = 4$  Thy1::ChR2 mice, 3 WT mice;  $*P < 0.05$ ; Error bars, SEM. Value of (—) over x-axis =  $0 \pm 0$ .

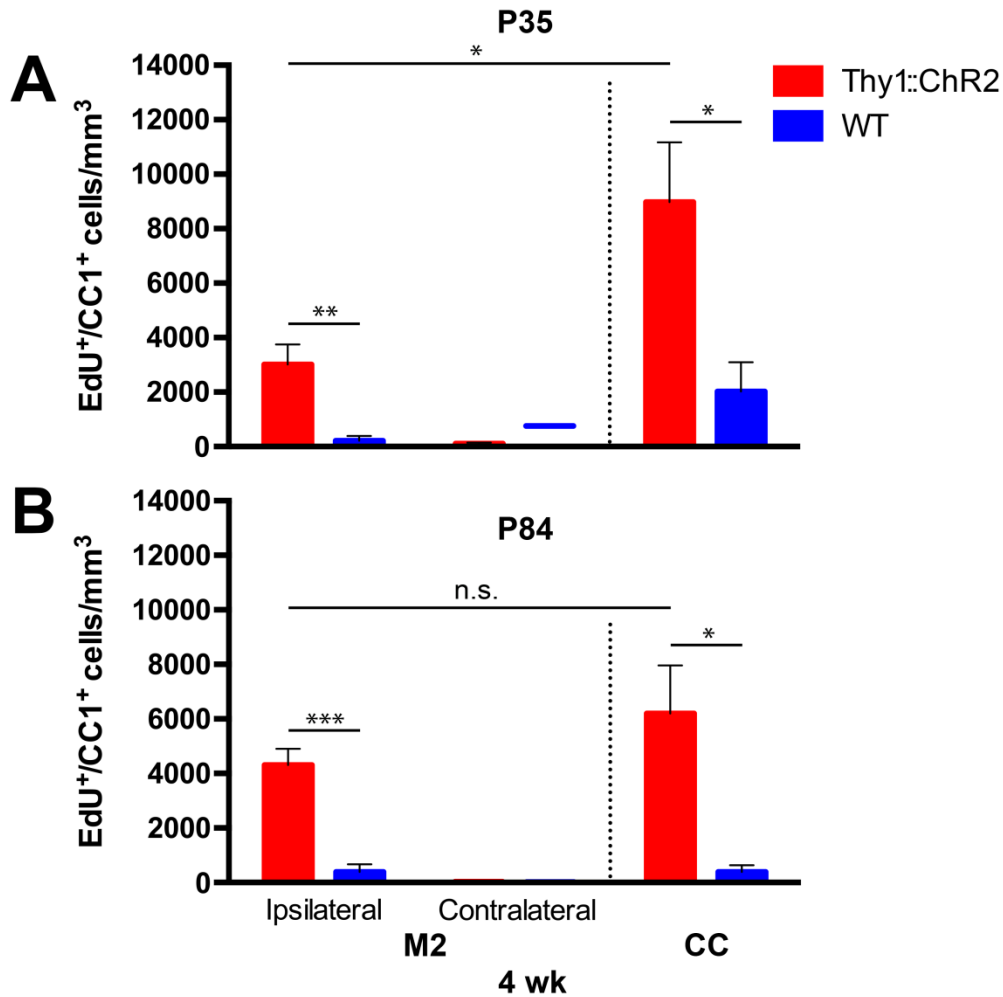

**Fig. S8. EdU<sup>+</sup> oligodendrocytes normalized to tissue volume**

The total number of EdU<sup>+</sup>/CC1<sup>+</sup> oligodendrocytes quantified 4 weeks following the end of the 7-day stimulation paradigm was normalized to the total volume (in cubic millimeters) of M2 cortex or corpus callosum (CC) for animals optogenetically manipulated at P35 (**A**) or P84 (**B**). In all graphs, red bars = Thy1::ChR2 mice and blue bars = WT littermate controls identically manipulated. \* $P < 0.05$ , \*\* $P < 0.01$ , \*\*\* $P < 0.001$ . Error bars, SEM. Value of (—) over x-axis =  $0 \pm 0$ .

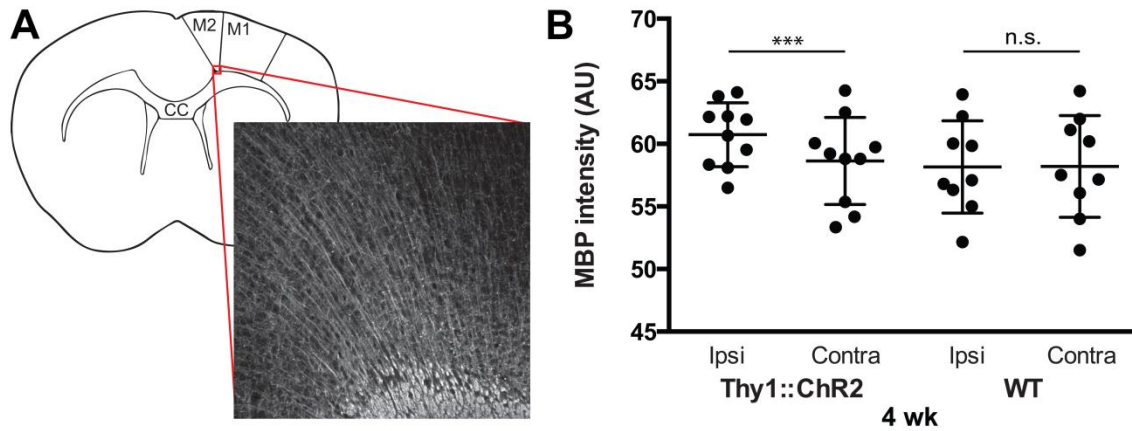

**Fig. S9. MBP Expression.** (A) Confocal photomicrograph (100X) of MBP<sup>+</sup> M2 fibers entering the corpus callosum. (B) Intensity measurements of MBP expression comparing ipsilateral to contralateral sides within a given slice. MBP intensity measured in the projections from M2 as they enter the corpus callosum in the region shown was increased on the side ipsilateral to optogenetic stimulation as compared to the contralateral side in Thy1::ChR2 mice; there was no significance observed between ipsilateral and contralateral sides in identically manipulated WT mice.  $N = 10$  Thy1::ChR2 and  $n = 9$  WT; \*\*\* $P < 0.001$ , n.s. indicates  $P > 0.05$ .

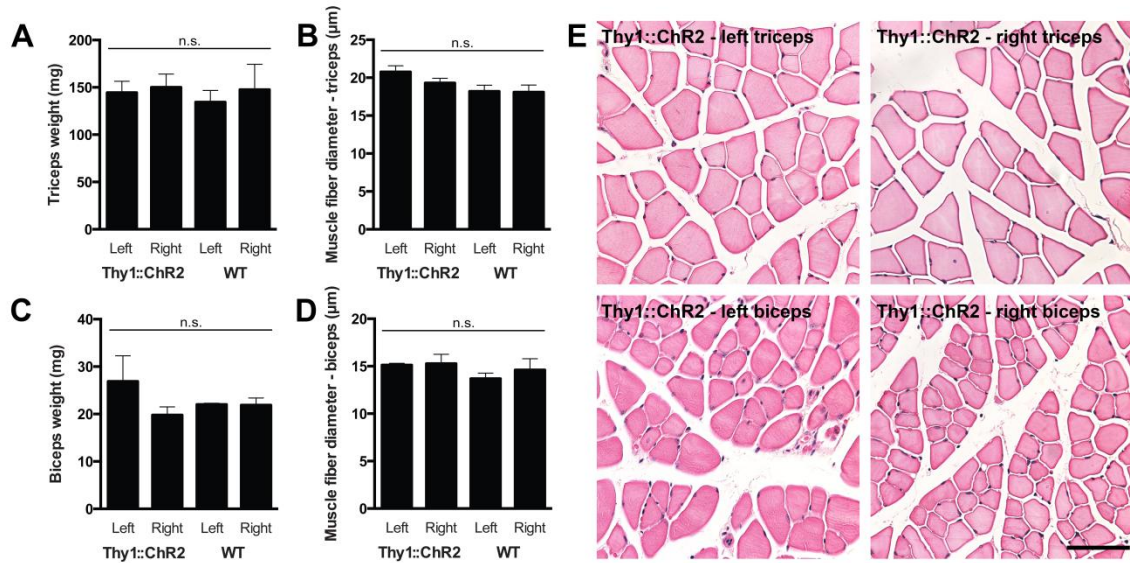

**Fig. S10. The optogenetic stimulation paradigm does not affect muscle mass or myofiber morphology.** We found no difference in triceps (**A** and **B**) or biceps brachii (**C** and **D**) mass or myofiber diameter between limbs or between groups. (**E**) Low-powered light photomicrographs of representative H&E-stained left and right triceps and biceps muscles from stimulated Thy1::ChR2 mice. Error bars, SEM.  $n = 4$  mice/group. Scale bar = 50 μm. n.s. indicates  $P$  value > 0.05.

## References and Notes

1. P. I. Yakovlev, "The myelogenetic cycles of regional maturation of the brain." in *Regional Development of the Brain in Early Life*, A. Minkowski, Ed. (Blackwell Scientific Publications, Oxford, 1967), pp. 3–70.
2. C. Lebel, M. Gee, R. Camicioli, M. Wieler, W. Martin, C. Beaulieu, Diffusion tensor imaging of white matter tract evolution over the lifespan. *Neuroimage* **60**, 340–352 (2012). [Medline doi:10.1016/j.neuroimage.2011.11.094](#)
3. F. M. Benes, Myelination of cortical-hippocampal relays during late adolescence. *Schizophr. Bull.* **15**, 585–593 (1989). [Medline doi:10.1093/schbul/15.4.585](#)
4. E. Zuccaro, P. Arlotta, The quest for myelin in the adult brain. *Nat. Cell Biol.* **15**, 572–575 (2013). [Medline doi:10.1038/ncb2750](#)
5. B. A. Barres, M. C. Raff, Proliferation of oligodendrocyte precursor cells depends on electrical activity in axons. *Nature* **361**, 258–260 (1993). [Medline doi:10.1038/361258a0](#)
6. C. Demerens, B. Stankoff, M. Logak, P. Anglade, B. Allinquant, F. Couraud, B. Zalc, C. Lubetzki, Induction of myelination in the central nervous system by electrical activity. *Proc. Natl. Acad. Sci. U.S.A.* **93**, 9887–9892 (1996). [Medline doi:10.1073/pnas.93.18.9887](#)
7. B. Stevens, S. Tanner, R. D. Fields, Control of myelination by specific patterns of neural impulses. *J. Neurosci.* **18**, 9303–9311 (1998). [Medline](#)
8. T. Ishibashi, K. A. Dakin, B. Stevens, P. R. Lee, S. V. Kozlov, C. L. Stewart, R. D. Fields, Astrocytes promote myelination in response to electrical impulses. *Neuron* **49**, 823–832 (2006). [Medline doi:10.1016/j.neuron.2006.02.006](#)
9. H. Wake, P. R. Lee, R. D. Fields, Control of local protein synthesis and initial events in myelination by action potentials. *Science* **333**, 1647–1651 (2011). [doi:10.1126/science.1206998](#)
10. Q. Li, M. Brus-Ramer, J. H. Martin, J. W. McDonald, Electrical stimulation of the medullary pyramid promotes proliferation and differentiation of oligodendrocyte progenitor cells in the corticospinal tract of the adult rat. *Neurosci. Lett.* **479**, 128–133 (2010). [Medline doi:10.1016/j.neulet.2010.05.043](#)
11. G. Goldsberry, D. Mitra, D. MacDonald, Z. Patay, Accelerated myelination with motor system involvement in a neonate with immediate postnatal onset of seizures and hemimegalencephaly. *Epilepsy Behav.* **22**, 391–394 (2011). [Medline doi:10.1016/j.yebeh.2011.06.025](#)
12. D. E. Bergles, J. D. Roberts, P. Somogyi, C. E. Jahr, Glutamatergic synapses on oligodendrocyte precursor cells in the hippocampus. *Nature* **405**, 187–191 (2000). [Medline doi:10.1038/35012083](#)
13. S. C. Lin, J. H. Huck, J. D. Roberts, W. B. Macklin, P. Somogyi, D. E. Bergles, Climbing fiber innervation of NG2-expressing glia in the mammalian cerebellum. *Neuron* **46**, 773–785 (2005). [Medline doi:10.1016/j.neuron.2005.04.025](#)

14. R. Káradóttir, P. Cavelier, L. H. Bergersen, D. Attwell, NMDA receptors are expressed in oligodendrocytes and activated in ischaemia. *Nature* **438**, 1162–1166 (2005). [Medline doi:10.1038/nature04302](#)
15. J. L. Ziskin, A. Nishiyama, M. Rubio, M. Fukaya, D. E. Bergles, Vesicular release of glutamate from unmyelinated axons in white matter. *Nat. Neurosci.* **10**, 321–330 (2007). [Medline doi:10.1038/nn1854](#)
16. J. M. Mangin, A. Kunze, R. Chittajallu, V. Gallo, Satellite NG2 progenitor cells share common glutamatergic inputs with associated interneurons in the mouse dentate gyrus. *J. Neurosci.* **28**, 7610–7623 (2008). [Medline doi:10.1523/JNEUROSCI.1355-08.2008](#)
17. L. M. De Biase, A. Nishiyama, D. E. Bergles, Excitability and synaptic communication within the oligodendrocyte lineage. *J. Neurosci.* **30**, 3600–3611 (2010). [Medline doi:10.1523/JNEUROSCI.6000-09.2010](#)
18. L. M. De Biase, S. H. Kang, E. G. Baxi, M. Fukaya, M. L. Pucak, M. Mishina, P. A. Calabresi, D. E. Bergles, NMDA receptor signaling in oligodendrocyte progenitors is not required for oligodendrogenesis and myelination. *J. Neurosci.* **31**, 12650–12662 (2011). [Medline doi:10.1523/JNEUROSCI.2455-11.2011](#)
19. B. R. Arenkiel, J. Peca, I. G. Davison, C. Feliciano, K. Deisseroth, G. J. Augustine, M. D. Ehlers, G. Feng, In vivo light-induced activation of neural circuitry in transgenic mice expressing channelrhodopsin-2. *Neuron* **54**, 205–218 (2007). [Medline doi:10.1016/j.neuron.2007.03.005](#)
20. H. Wang, J. Peca, M. Matsuzaki, K. Matsuzaki, J. Noguchi, L. Qiu, D. Wang, F. Zhang, E. Boyden, K. Deisseroth, H. Kasai, W. C. Hall, G. Feng, G. J. Augustine, High-speed mapping of synaptic connectivity using photostimulation in Channelrhodopsin-2 transgenic mice. *Proc. Natl. Acad. Sci. U.S.A.* **104**, 8143–8148 (2007). [Medline doi:10.1073/pnas.0700384104](#)
21. E. S. Boyden, F. Zhang, E. Bamberg, G. Nagel, K. Deisseroth, Millisecond-timescale, genetically targeted optical control of neural activity. *Nat. Neurosci.* **8**, 1263–1268 (2005). [Medline doi:10.1038/nn1525](#)
22. O. Yizhar, L. E. Fenno, T. J. Davidson, M. Mogri, K. Deisseroth, Optogenetics in neural systems. *Neuron* **71**, 9–34 (2011). [Medline doi:10.1016/j.neuron.2011.06.004](#)
23. C. M. Gremel, R. M. Costa, Premotor cortex is critical for goal-directed actions. *Front. Comput. Neurosci.* **7**, 110 (2013). [Medline doi:10.3389/fncom.2013.00110](#)
24. E. G. Hughes, S. H. Kang, M. Fukaya, D. E. Bergles, Oligodendrocyte progenitors balance growth with self-repulsion to achieve homeostasis in the adult brain. *Nat. Neurosci.* **16**, 668–676 (2013). [Medline doi:10.1038/nn.3390](#)
25. V. E. Miron, A. Boyd, J. W. Zhao, T. J. Yuen, J. M. Ruckh, J. L. Shadrach, P. van Wijngaarden, A. J. Wagers, A. Williams, R. J. Franklin, C. French-Constant, M2 microglia and macrophages drive oligodendrocyte differentiation during CNS remyelination. *Nat. Neurosci.* **16**, 1211–1218 (2013). [Medline doi:10.1038/nn.3469](#)
26. C. Y. Brazel, T. L. Limke, J. K. Osborne, T. Miura, J. Cai, L. Pevny, M. S. Rao, Sox2 expression defines a heterogeneous population of neurosphere-forming cells in the adult

- murine brain. *Aging Cell* **4**, 197–207 (2005). [Medline doi:10.1111/j.1474-9726.2005.00158.x](#)
27. M. L. Monje, H. Toda, T. D. Palmer, Inflammatory blockade restores adult hippocampal neurogenesis. *Science* **302**, 1760–1765 (2003). [doi:10.1126/science.1088417](#)
  28. C. T. Ekdahl, J. H. Claassen, S. Bonde, Z. Kokaia, O. Lindvall, Inflammation is detrimental for neurogenesis in adult brain. *Proc. Natl. Acad. Sci. U.S.A.* **100**, 13632–13637 (2003). [Medline doi:10.1073/pnas.2234031100](#)
  29. O. Butovsky, Y. Ziv, A. Schwartz, G. Landa, A. E. Talpalar, S. Pluchino, G. Martino, M. Schwartz, Microglia activated by IL-4 or IFN- $\gamma$  differentially induce neurogenesis and oligodendrogenesis from adult stem/progenitor cells. *Mol. Cell. Neurosci.* **31**, 149–160 (2006). [Medline doi:10.1016/j.mcn.2005.10.006](#)
  30. Y. Imai, I. Ibata, D. Ito, K. Ohsawa, S. Kohsaka, A novel gene *iba1* in the major histocompatibility complex class III region encoding an EF hand protein expressed in a monocytic lineage. *Biochem. Biophys. Res. Commun.* **224**, 855–862 (1996). [Medline doi:10.1006/bbrc.1996.1112](#)
  31. D. Ito, Y. Imai, K. Ohsawa, K. Nakajima, Y. Fukuuchi, S. Kohsaka, Microglia-specific localisation of a novel calcium binding protein, *Iba1*. *Brain Res. Mol. Brain Res.* **57**, 1–9 (1998). [Medline doi:10.1016/S0169-328X\(98\)00040-0](#)
  32. M. B. Graeber, W. J. Streit, R. Kiefer, S. W. Schoen, G. W. Kreutzberg, New expression of myelomonocytic antigens by microglia and perivascular cells following lethal motor neuron injury. *J. Neuroimmunol.* **27**, 121–132 (1990). [Medline doi:10.1016/0165-5728\(90\)90061-Q](#)
  33. P. J. Kingham, M. L. Cuzner, J. M. Pocock, Apoptotic pathways mobilized in microglia and neurones as a consequence of chromogranin A-induced microglial activation. *J. Neurochem.* **73**, 538–547 (1999). [Medline doi:10.1046/j.1471-4159.1999.0730538.x](#)
  34. T. Yue, K. Xian, E. Hurlock, M. Xin, S. G. Kernie, L. F. Parada, Q. R. Lu, A critical role for dorsal progenitors in cortical myelination. *J. Neurosci.* **26**, 1275–1280 (2006). [Medline doi:10.1523/JNEUROSCI.4717-05.2006](#)
  35. R. A. Hill, K. D. Patel, J. Medved, A. M. Reiss, A. Nishiyama, NG2 cells in white matter but not gray matter proliferate in response to PDGF. *J. Neurosci.* **33**, 14558–14566 (2013). [Medline doi:10.1523/JNEUROSCI.2001-12.2013](#)
  36. M. Fruttiger, A. R. Calver, W. D. Richardson, Platelet-derived growth factor is constitutively secreted from neuronal cell bodies but not from axons. *Curr. Biol.* **10**, 1283–1286 (2000). [Medline doi:10.1016/S0960-9822\(00\)00757-0](#)
  37. S. Shen, J. Li, P. Casaccia-Bonofil, Histone modifications affect timing of oligodendrocyte progenitor differentiation in the developing rat brain. *J. Cell Biol.* **169**, 577–589 (2005). [Medline doi:10.1083/jcb.200412101](#)
  38. M. Wu, M. Hernandez, S. Shen, J. K. Sabo, D. Kelkar, J. Wang, R. O’Leary, G. R. Phillips, H. S. Cate, P. Casaccia, Differential modulation of the oligodendrocyte transcriptome by sonic hedgehog and bone morphogenetic protein 4 via opposing effects on histone



- acetylation. *J. Neurosci.* **32**, 6651–6664 (2012). [Medline doi:10.1523/JNEUROSCI.4876-11.2012](#)
39. H. A. Arnett, S. P. Fancy, J. A. Alberta, C. Zhao, S. R. Plant, S. Kaing, C. S. Raine, D. H. Rowitch, R. J. Franklin, C. D. Stiles, bHLH transcription factor Olig1 is required to repair demyelinated lesions in the CNS. *Science* **306**, 2111–2115 (2004). [doi:10.1126/science.1103709](#)
40. R. S. Smith, Z. J. Koles, Myelinated nerve fibers: Computed effect of myelin thickness on conduction velocity. *Am. J. Physiol.* **219**, 1256–1258 (1970). [Medline](#)
41. F. P. Hamers, A. J. Lankhorst, T. J. van Laar, W. B. Veldhuis, W. H. Gispen, Automated quantitative gait analysis during overground locomotion in the rat: Its application to spinal cord contusion and transection injuries. *J. Neurotrauma* **18**, 187–201 (2001). [Medline doi:10.1089/08977150150502613](#)
42. P. Shi, M. A. Scott, B. Ghosh, D. Wan, Z. Wissner-Gross, R. Mazitschek, S. J. Haggarty, M. F. Yanik, Synapse microarray identification of small molecules that enhance synaptogenesis. *Nat. Commun.* **2**, 510 (2011). [Medline doi:10.1038/ncomms1518](#)
43. M. J. Morris, M. Mahgoub, E. S. Na, H. Pranav, L. M. Monteggia, Loss of histone deacetylase 2 improves working memory and accelerates extinction learning. *J. Neurosci.* **33**, 6401–6411 (2013). [Medline doi:10.1523/JNEUROSCI.1001-12.2013](#)
44. K. M. Young, K. Psachoulia, R. B. Tripathi, S. J. Dunn, L. Cossell, D. Attwell, K. Tohyama, W. D. Richardson, Oligodendrocyte dynamics in the healthy adult CNS: Evidence for myelin remodeling. *Neuron* **77**, 873–885 (2013). [Medline doi:10.1016/j.neuron.2013.01.006](#)
45. J. Scholz, M. C. Klein, T. E. Behrens, H. Johansen-Berg, Training induces changes in white-matter architecture. *Nat. Neurosci.* **12**, 1370–1371 (2009). [Medline doi:10.1038/nn.2412](#)
46. C. Sampaio-Baptista, A. A. Khrapitchev, S. Foxley, T. Schlagheck, J. Scholz, S. Jbabdi, G. C. DeLuca, K. L. Miller, A. Taylor, N. Thomas, J. Kleim, N. R. Sibson, D. Bannerman, H. Johansen-Berg, Motor skill learning induces changes in white matter microstructure and myelination. *J. Neurosci.* **33**, 19499–19503 (2013). [Medline doi:10.1523/JNEUROSCI.3048-13.2013](#)
47. J. Liu, K. Dietz, J. M. DeLoyht, X. Pedre, D. Kelkar, J. Kaur, V. Vialou, M. K. Lobo, D. M. Dietz, E. J. Nestler, J. Dupree, P. Casaccia, Impaired adult myelination in the prefrontal cortex of socially isolated mice. *Nat. Neurosci.* **15**, 1621–1623 (2012). [Medline doi:10.1038/nn.3263](#)
48. M. Makinodan, K. M. Rosen, S. Ito, G. Corfas, A critical period for social experience-dependent oligodendrocyte maturation and myelination. *Science* **337**, 1357–1360 (2012). [doi:10.1126/science.1220845](#)
49. C. Liu, J. C. Sage, M. R. Miller, R. G. Verhaak, S. Hippenmeyer, H. Vogel, O. Foreman, R. T. Bronson, A. Nishiyama, L. Luo, H. Zong, Mosaic analysis with double markers reveals tumor cell of origin in glioma. *Cell* **146**, 209–221 (2011). [Medline doi:10.1016/j.cell.2011.06.014](#)



50. P. R. Roelfsema, A. K. Engel, P. König, W. Singer, Visuomotor integration is associated with zero time-lag synchronization among cortical areas. *Nature* **385**, 157–161 (1997). [Medline doi:10.1038/385157a0](#)
51. S. Pajevic, P. J. Basser, R. D. Fields, Role of myelin plasticity in oscillations and synchrony of neuronal activity. *Neuroscience* (2013). [Medline doi:10.1016/j.neuroscience.2013.11.007](#)
52. A. A. Schlegel, J. J. Rudelson, P. U. Tse, White matter structure changes as adults learn a second language. *J. Cogn. Neurosci.* **24**, 1664–1670 (2012). [Medline doi:10.1162/jocn\\_a\\_00240](#)
53. M. Monje, S. S. Mitra, M. E. Freret, T. B. Raveh, J. Kim, M. Masek, J. L. Attema, G. Li, T. Haddix, M. S. Edwards, P. G. Fisher, I. L. Weissman, D. H. Rowitch, H. Vogel, A. J. Wong, P. A. Beachy, Hedgehog-responsive candidate cell of origin for diffuse intrinsic pontine glioma. *Proc. Natl. Acad. Sci. U.S.A.* **108**, 4453–4458 (2011). [Medline doi:10.1073/pnas.1101657108](#)
54. G. Wu, A. Broniscer, T. A. McEachron, C. Lu, B. S. Paugh, J. Becksfort, C. Qu, L. Ding, R. Huether, M. Parker, J. Zhang, A. Gajjar, M. A. Dyer, C. G. Mullighan, R. J. Gilbertson, E. R. Mardis, R. K. Wilson, J. R. Downing, D. W. Ellison, J. Zhang, S. J. Baker; St. Jude Children’s Research Hospital–Washington University Pediatric Cancer Genome Project, Somatic histone H3 alterations in pediatric diffuse intrinsic pontine gliomas and non-brainstem glioblastomas. *Nat. Genet.* **44**, 251–253 (2012). [Medline doi:10.1038/ng.1102](#)
55. J. Schwartzentruber, A. Korshunov, X. Y. Liu, D. T. Jones, E. Pfaff, K. Jacob, D. Sturm, A. M. Fontebasso, D. A. Quang, M. Tönjes, V. Hovestadt, S. Albrecht, M. Kool, A. Nantel, C. Konermann, A. Lindroth, N. Jäger, T. Rausch, M. Ryzhova, J. O. Korbel, T. Hielscher, P. Hauser, M. Garami, A. Klekner, L. Bogner, M. Ebinger, M. U. Schuhmann, W. Scheurlen, A. Pekrun, M. C. Frühwald, W. Roggendorf, C. Kramm, M. Dürken, J. Atkinson, P. Lepage, A. Montpetit, M. Zakrzewska, K. Zakrzewski, P. P. Liberski, Z. Dong, P. Siegel, A. E. Kulozik, M. Zapatka, A. Guha, D. Malkin, J. Felsberg, G. Reifenberger, A. von Deimling, K. Ichimura, V. P. Collins, H. Witt, T. Milde, O. Witt, C. Zhang, P. Castelo-Branco, P. Lichter, D. Faury, U. Tabori, C. Plass, J. Majewski, S. M. Pfister, N. Jabado, Driver mutations in histone H3.3 and chromatin remodelling genes in paediatric glioblastoma. *Nature* **482**, 226–231 (2012). [Medline doi:10.1038/nature10833](#)
56. F. Zhang, V. Gradinaru, A. R. Adamantidis, R. Durand, R. D. Airan, L. de Lecea, K. Deisseroth, Optogenetic interrogation of neural circuits: Technology for probing mammalian brain structures. *Nat. Protoc.* **5**, 439–456 (2010). [Medline doi:10.1038/nprot.2009.226](#)
57. B. J. Franklin, G. Paxinos, *The Mouse Brain* (Elsevier, New York, 2008).
58. J. D. Cahoy, B. Emery, A. Kaushal, L. C. Foo, J. L. Zamanian, K. S. Christopherson, Y. Xing, J. L. Lubischer, P. A. Krieg, S. A. Krupenko, W. J. Thompson, B. A. Barres, A transcriptome database for astrocytes, neurons, and oligodendrocytes: A new resource for understanding brain development and function. *J. Neurosci.* **28**, 264–278 (2008). [Medline doi:10.1523/JNEUROSCI.4178-07.2008](#)
